# Supplementary material for: Developmental constraints mediate the reversal of temperature effects on the autumn phenology of European beech after the summer solstice
Source: eLife. 2026 May 22;14:RP107554. doi: 10.7554/eLife.107554 (PMC13197167; doi:10.7554/eLife.107554)
Supplement: Supplementary file 1. — Mean and 95% confidence intervals of 50% leaf-out (day-of-year BBCH15), bud set (day-of-year), leaf-off (day-of-year 50% loss of leaf chlorophyll), and absolute bud growth (cm) for each treatment in experiment 1. [file elife-107554-supp1.xlsx]

## Sheet: Sheet1
Treatment	Leaf-out DOY	Bud set DOY	Leaf-off DOY	Absolute bud growth CM
	(95% CI)	(95% CI)	(95% CI)	(95% CI)
1	131.6	260.5	317.3	12.88
	(130.2-133.0)	(259.1-261.9)	(314.5-320.1)	(11.96-13.80)
2	148.1	264.1	322.4	14.21
	(147.8-148.4)	(262.4-265.8)	(320.2-324.6)	(13.53-14.89)
3	131.2	261.9	319.6	10.95
	(129.7-132.7)	(260.0-263.8)	(317.8-321.4)	(10.29-11.61)
4	148.6	268.9	325.5	12.72
	(148.2-149.0)	(267.2-270.6)	(323.5-327.5)	(11.99-13.45)
5	130.1	263.1	322.8	10.89
	(128.9-131.3)	(261.1-265.1)	(320.5-325.1)	(10.41-11.37)
6	148.7	268.1	323.4	10.97
	(148.4-149.0)	(266.2-270.0)	(321.7-325.1)	(10.35-11.59)
7	130.2	256	312.2	12.85
	(128.6-131.8)	(254.6-257.4)	(309.4-315.0)	(12.17-13.53)
8	148.9	259.7	319.8	11.28
	(148.6-149.2)	(257.7-261.7)	(318.3-321.3)	(10.63-11.93)
9	132.3	258.6	319.1	9.71
	(130.8-133.8)	(256.5-260.7)	(316.6-321.6)	(9.22-10.20)
10	148	262.2	320	10.46
	(147.6-148.4)	(260.5-263.9)	(317.9-322.1)	(9.81-11.11)
