# Supplementary material for: Developmental constraints mediate the reversal of temperature effects on the autumn phenology of European beech after the summer solstice
Source: eLife. 2026 May 22;14:RP107554. doi: 10.7554/eLife.107554 (PMC13197167; doi:10.7554/eLife.107554)
Supplement: Supplementary file 2. — Mean and 95% confidence intervals of bud set (day-of-year), leaf-off (day-of-year 50% loss of leaf chlorophyll), and absolute bud growth (cm) for each treatment in experiment 2. [file elife-107554-supp2.xlsx]

## Sheet: Sheet1
Treatment	Bud set DOY (95% CI)	Leaf-off DOY (95% CI)	Absolute bud growth CM (95% CI)
Ambient control	257.2 (254.7-259.7)	321.1 (318.9-323.3)	4.47 (3.80-5.14)
Pre-chamber-control	257.1 (254.1-260.1)	319.8 (315.8-323.8)	4.73 (3.82-5.54)
Pre-Full-day	260.6 (257.3-263.9)	322.7 (320.1-325.3)	5.18 (4.26-6.10)
Pre-Day	257.2 (252.7-261.7)	321.1 (318.4-323.8)	4.95 (3.96-5.94)
Pre-Night	261.0 (257.9-264.1)	322.8 (319.8-325.8)	5.01 (4.34-5.68)
Post-chamber-control	255.4 (251.8-259.0)	318.4 (315.8-321.0)	4.24 (3.45-5.03)
Post-Full-day	251.6 (248.3-254.9)	320.9 (319.1-322.7)	2.58 (2.08-3.08)
Post-Day	251.5 (248.0-255.0)	316.3 (313.2-319.4)	2.92 (2.32-3.52)
Post-Night	260.6 (256.7-264.5)	320.6 (317.9-323.3)	5.58 (4.70-6.46)
